# Supplementary material
Source: MDPI journal article supplement (https://www.mdpi.com/2077-1312/11/3/602)
Supplement: s1 [file s1]

**Supplementary Table S1.** List of compounds indicated on the total ion chromatogram of the extract *D. setosum* that were putatively identified using the DNP database. Peak IDs used in this table correspond to those designated for the chromatogram shown in Figure 5.

| Peak ID | Retention time<br>(Rt, min) | MS<br>(m/z) | Chemical<br>formula                                           | Molecular<br>weight | Compounds                                                                                      |
|---------|-----------------------------|-------------|---------------------------------------------------------------|---------------------|------------------------------------------------------------------------------------------------|
| 1       | 1.34                        | 162.1127    | C <sub>7</sub> H <sub>15</sub> NO <sub>3</sub>                | 161.1054            | 2-Aminoethanol; N-tert-Butyloxycarbonyl                                                        |
| 2       | 1.58                        | 162.0764    | C <sub>6</sub> H <sub>11</sub> NO <sub>4</sub>                | 161.0691            | 2-Aminohexanedioic acid                                                                        |
| 3       | 2.03                        | 243.0975    | C <sub>10</sub> H <sub>14</sub> N <sub>2</sub> O <sub>5</sub> | 242.0902            | Antibiotic SF 1774                                                                             |
| 4       | 2.24                        | 165.0760    | C <sub>6</sub> H <sub>12</sub> O <sub>5</sub>                 | 164.0688            | Fucose; L-form                                                                                 |
| 5       | 3.30                        | 189.1489    | C <sub>10</sub> H <sub>20</sub> O <sub>3</sub>                | 188.1416            | 8-Decene-1,3,5-triol                                                                           |
| 6       | 5.35                        | 203.1648    | C <sub>11</sub> H <sub>22</sub> O <sub>3</sub>                | 202.1571            | 3-Hydroxyundecanoic acid                                                                       |
| 7       | 7.72                        | 265.1289    | C <sub>12</sub> H <sub>24</sub> O <sub>2</sub> S <sub>2</sub> | 264.1216            | Hedathiosulfonic acid A                                                                        |
| 8       | 15.10                       | 237.1132    | C <sub>13</sub> H <sub>18</sub> O <sub>4</sub>                | 238.1205            | 4-Hydroxyphenylacetic acid;O-(2S-Hydroxy-3- methylbutyl)                                       |
| 9       | 15.31                       | 251.1289    | C <sub>14</sub> H <sub>20</sub> O <sub>4</sub>                | 252.1361            | 2,7-Dihydroxy-13-nor-1(10)-nardosinen-11-one; (2β,6β)- form, 1α,10α-Epoxide, 7- ketone         |
| 10      | 18.33                       | 527.2531    | C <sub>23</sub> H <sub>44</sub> O <sub>11</sub> S             | 528.2603            | 1-O-(6-Deoxy-6-sulfoglucopyranosyl)glycerol; α-D-form, 3-Tetradecanoyl                         |
| 11      | 21.38                       | 557.2982    | C <sub>28</sub> H <sub>46</sub> O <sub>11</sub>               | 558.3055            | 7(14)-Bisabolene-1,2,3,4,5,8,10,11-octol; 2- Angeloyl, 5,8-bis-O-(2-methylpropanoyl)           |
| 12      | 22.0                        | 555.2846    | C <sub>25</sub> H <sub>48</sub> O <sub>11</sub> S             | 556.2919            | 1-O-(6-Deoxy-6-sulfoglucopyranosyl)glycerol; α-D-form, 3-Hexadecanoyl                          |
| 13      | 22.35                       | 555.2846    | C <sub>17</sub> H <sub>28</sub> O <sub>4</sub>                | 296.1987            | Acaranoic acid; 1',3-Didehydro                                                                 |
| 14      | 22.56                       | 457.2945    | C <sub>28</sub> H <sub>40</sub> O <sub>5</sub>                | 456.2873            | 4(3→2)-Abeo-2-hydroxy-4,7-dioxoergosta-5,22-dien-3-oic acid                                    |
| 15      | 23.72                       | 279.2318    | C <sub>18</sub> H <sub>30</sub> O <sub>2</sub>                | 278.2245            | 2-Acetyl-5-dodecylfuran                                                                        |
| 16      | 24.24                       | 425.3050    | C <sub>28</sub> H <sub>40</sub> O <sub>3</sub>                | 424.2977            | 3-(Chloromethylene)-2,3- dihydro-1-benzoxepin-7- methanol; (E)-form, Dechloro, 9Z-hexadecenoyl |
| 17      | 25.67                       | 319.2261    | C <sub>20</sub> H <sub>30</sub> O <sub>3</sub>                | 318.2188            | 12-Hydroxy-5,8,10,14,17- eicosapentaenoic acid; (5Z,8Z,10E,12R,14Z,17Z)- form                  |
| 18      | 26.54                       | 425.2682    | C <sub>27</sub> H <sub>36</sub> O <sub>4</sub>                | 424.2609            | Adriaticone                                                                                    |
| 19      | 28.61                       | 522.3562    | C <sub>33</sub> H <sub>47</sub> NO <sub>4</sub>               | 521.3489            | Anthcolorin A; 3-Epimer, 3-hydroxy                                                             |
| 20      | 28.68                       | 353.3055    | C <sub>22</sub> H <sub>42</sub> O <sub>3</sub>                | 354.3128            | 2-Hydroxy-13-docosenoic acid; (Z)-form                                                         |
| 21      | 31.96                       | 465.3040    | C <sub>27</sub> H <sub>46</sub> O <sub>4</sub> S              | 466.3113            | Cholest-5-en-3-ol; 3β-form, 3-O-Sulfate                                                        |

**Supplementary Table S2.** List of compounds indicated on the total ion chromatogram of the extract *S. lanceolata* that were putatively identified using the DNP database. Peak IDs used in this table correspond to those designated for the chromatogram shown in Figure 7.

| Peak ID | Retention time (Rt, min) | MS (m/z) | Chemical formula                                                              | Molecular weight | Compounds                                                                    |
|---------|--------------------------|----------|-------------------------------------------------------------------------------|------------------|------------------------------------------------------------------------------|
| 1       | 1.33                     | 205.0686 | C <sub>12</sub> H <sub>12</sub> OS                                            | 204.0613         | 8-(2-Thienyl)-3,5-octadien-7-yn-1-ol                                         |
| 2       | 1.31                     | 217.0630 | C <sub>9</sub> H <sub>15</sub> O <sub>4</sub> P                               | 218.0704         | (3-Methyloxiranyl)phosphonic acid; (2RS,3SR)-form, Di-2- propenyl ester      |
| 3       | 1.80                     | 227.0928 | C <sub>11</sub> H <sub>16</sub> O <sub>5</sub>                                | 228.1000         | 1-(3,5-Dihydroxyphenyl)-1,2,3- propanetriol; (1R,2S)-form, 1,3'- Di-Me ether |
| 4       | 2.10                     | 169.0252 | C <sub>6</sub> H <sub>6</sub> N <sub>2</sub> O <sub>4</sub>                   | 170.0324         | 2,6-Dihydroxy-4-pyrimidinecarboxylic acid; NH- form, N1-Me                   |
| 5       | 6.52                     | 433.2384 | C <sub>28</sub> H <sub>34</sub> O <sub>4</sub>                                | 434.2457         | Scutone; 20 $\alpha$ -Hydroxy                                                |
| 6       | 6.87                     | 593.1931 | C <sub>34</sub> H <sub>30</sub> N <sub>2</sub> O <sub>8</sub>                 | 594.2005         | Cannabisin A                                                                 |
| 7       | 7.71                     | 449.1083 | C <sub>21</sub> H <sub>20</sub> O <sub>11</sub>                               | 448.1011         | Astragalin                                                                   |
| 8       | 8.66                     | 507.1502 | C <sub>24</sub> H <sub>28</sub> O <sub>12</sub>                               | 508.1575         | Antirrhinoside; 5-Epimer, 6'-O- (4-hydroxy-Z-cinnamoyl)                      |
| 9       | 8.66                     | 431.1288 | C <sub>10</sub> H <sub>18</sub> O <sub>3</sub>                                | 432.1360         | 3,7-Dimethyl-1,6-octadien-3-ol; ( $\xi$ )-form, 5,10-Dihydroxy               |
| 10      | 10.46                    | 461.1422 | C <sub>13</sub> H <sub>18</sub> O                                             | 462.1495         | 2,4,5,7a-Tetrahydro-1,4,4,7a- tetramethyl-1H-inden-2-ol; 8 Ketone            |
| 11      | 11.13                    | 285.0606 | C <sub>9</sub> H <sub>13</sub> NO <sub>2</sub>                                | 286.0677         | Epine                                                                        |
| 12      | 18.16                    | 721.4164 | C <sub>40</sub> H <sub>58</sub> N <sub>4</sub> O <sub>8</sub>                 | 722.4238         | Antanapeptin D                                                               |
| 13      | 18.16                    | 447.1248 | C <sub>10</sub> H <sub>20</sub> O <sub>3</sub>                                | 448.1321         | 5-Hydroxyoctanoic acid; ( $\pm$ )- form, Et ester                            |
| 14      | 21.87                    | 571.3291 | C <sub>33</sub> H <sub>48</sub> O <sub>8</sub>                                | 572.3364         | Acutaxyline B; 25-Hydroxy, 7- Ac                                             |
| 15      | 24.86                    | 617.4213 | C <sub>10</sub> H <sub>15</sub> NO <sub>3</sub>                               | 618.4286         | Normetanephine; (R)-form, N- Me                                              |
| 16      | 25.37                    | 617.4215 | C <sub>10</sub> H <sub>15</sub> NO <sub>3</sub>                               | 618.4288         | Scopine; O-Ac                                                                |
| 17      | 25.34                    | 617.4274 | C <sub>10</sub> H <sub>15</sub> NO <sub>3</sub>                               | 618.4348         | Tenuazonic acid                                                              |
| 18      | 25.32                    | 617.4276 | C <sub>10</sub> H <sub>15</sub> NO <sub>3</sub>                               | 618.4349         | 2,3,5,7a-Tetrahydro-1-hydroxy-1H-pyrrolizine-7-methanol; (7R,8R)-form, 7-Ac  |
| 19      | 30.17                    | 593.2762 | C <sub>34</sub> H <sub>40</sub> O <sub>9</sub>                                | 592.2689         | 17-Hydroxyingenol; 17-Benzoyl, 3-angeloyl, 5-Ac                              |
| 20      | 32.49                    | 607.2921 | C <sub>36</sub> H <sub>38</sub> N <sub>4</sub> O <sub>5</sub>                 | 606.2848         | Phaeophorbide a; 10-Epimer, 3''- Me ester                                    |
| 21      | 37.90                    | 703.2372 | C <sub>34</sub> H <sub>44</sub> N <sub>2</sub> O <sub>10</sub> S <sub>2</sub> | 704.2445         | Antibiotic Sch 64874                                                         |
